# Supplementary material
Source: publisher figshare collection journal article supplement (https://gsapubs.figshare.com/ndownloader/files/23317004)
Supplement: Supplementary file 1 [file 23317004]

## Sheet: cat
Category Tables
Depth (m)	Depth Category	Depth (m)	Computed Depth Category		Age (m)	Age Category	Age (Ma)	Computed Age Category
51	000-050 m	0	000-050 m		0	Modern		???	0	Modern	0	Modern
101	051-100 m	50	000-050 m		0.011	Holocene (<11 kyr)	0.005	Holocene (<11 kyr)	2.5	2.5-0.1 Ma	3	3-0.1 Ma
151	101-150 m	75	051-100 m		1.5	1.5 to 0.011 Ma	1	1.5 to 0.011 Ma	4.25	4.25-2.5 Ma	4.25	4.25-2.5 Ma
150	150+ m	200	150+ m		2.5	2.5-1.5 Ma	2	2.5-1.5 Ma		4.25+ Ma	cat	4.25+ Ma
					4.25	4.25-2.5 Ma	3	4.25-2.5 Ma
						4.25+ Ma	4	4.25-2.5 Ma
	Key						5	4.25+ Ma
	Limon						6	4.25+ Ma
	0-50 m
	50-100 m
	Bocas del Toro
	0-50 m
	50-100 m
	100-150 m
	>150 m
	Pacific
	0-50 m
	50-100 m
	100-150 m
	>150 m

## Sheet: pivot
Row Labels	Average of δ18O median (‰)	Count of δ18O median (‰)	Average of d18O med 2	Count of d18O med 2	Average of δ18O range (‰)	Average of δ13C-δ18O R
4.25+ Ma
101-150	0.07	1	0.07	1	0.56	0.6
SWC	0.07	1	0.07	1	0.56	0.6
4.25-2.5 Ma
0-50	-0.891617	27	-0.891617	27	1.07804	0.209809
SWC	-0.920546	25	-0.920546	25	1.02428	0.224194
TEP	-0.53	2	-0.53	2	1.75	0.03
101-150	0.33524	8	0.33524	8	1.00934	0.103864
SWC	0.33524	8	0.33524	8	1.00934	0.103864
151-200	1.24219	3	1.24219	3	0.663934	0.298427
SWC	1.24219	3	1.24219	3	0.663934	0.298427
51-100	-0.6112	14	-0.733095	13	1.0557	0.131473
SWC	-0.6112	14	-0.733095	13	1.0557	0.131473
2.5-0.1 Ma
0-50	0.359222	9	-0.07725	4	1.14188	0.157609
SWC	0.393428	7	-0.394	2	0.928843	0.164758
TEP	0.2395	2	0.2395	2	1.8875	0.132586
101-150	0.234884	3	0.234884	3	1.07005	0.184799
SWC	0.234884	3	0.234884	3	1.07005	0.184799
51-100	0.198199	9	0.198199	9	0.898345	0.380425
SWC	0.198199	9	0.198199	9	0.898345	0.380425
Grand Total	-0.276088	74	-0.366852	68	1.02818	0.205789

## Sheet: pivot 2
Row Labels	Average of δ18O range (‰)	StdDev of δ18O range (‰)	Average of δ18O median (‰)	Average of d18O med-baseline	StdDev of d18O med-baseline2	Count of d18O med-baseline	Average of d18Omin-baseline	Count of δ18O range (‰)	2SE
2.5-0.1 Ma	1.02724	0.358846	0.27245	0.125307	0.513099	21	-0.393254	21
SWC	0.936692	0.212397	0.275918	0.0938128	0.450595	19	-0.382334	19	0.133579
0-50	0.894	0.124898	0.2166	0.3666	0.628134	5	-0.154	5
101-150	1.07005	0.142159	0.234884	-0.145116	0.319325	3	-0.574912	3
51-100	0.919728	0.253689	0.314072	0.0349809	0.35932	11	-0.433601	11
TEP	1.8875	0.357089	0.2395	0.4245	1.18865	2	-0.497	2
0-50	1.8875	0.357089	0.2395	0.4245	1.18865	2	-0.497	2
4.25+ Ma	0.56	#DIV/0!	0.07					1	0.133579
SWC	0.56	#DIV/0!	0.07					1
151-200	0.56	#DIV/0!	0.07					1
4.25-2.5 Ma	1.03757	0.468029	-0.504269	-0.385888	0.47744	49	-0.973597	52
SWC	1.00907	0.451318	-0.50324	-0.418054	0.457887	47	-0.98527	50
0-50	1.02428	0.45614	-0.920546	-0.465346	0.29042	25	-1.02851	25
101-150	1.00934	0.232149	0.33524	-0.0447599	0.308317	8	-0.624443	8
151-200	0.663934	0.305832	1.24219					3
51-100	1.0557	0.556725	-0.6112	-0.546915	0.653485	14	-1.11424	14
TEP	1.75	0.367696	-0.53	0.37	0.325269	2	-0.699296	2
0-50	1.75	0.367696	-0.53	0.37	0.325269	2	-0.699296	2
Grand Total	1.02818	0.437471	-0.276088	-0.23253	0.539033	70	-0.799494	74
			-0.831946
			-0.581895

## Sheet: Table 1
Map #	#	ID	PPP#	Region	Location	Latitude	Longitude	Taxon	Formation	Faunule	Age* (Ma)	Median Age (Ma)	Age Category	Age category 2	Epoch	Depth lower (m)	Depth upper (m)	Paleo-depth median (m)	Paleo-depth category (m)	Baseline (‰)	Reference**	δ18O mean (‰)	δ18O stdev (‰)	δ18O median (‰)	δ18O min (‰)	δ18O max (‰)	δ18O range (‰)	δ13C mean (‰)	δ13C stdev (‰)	δ13C median (‰)	δ13C-δ18O R	p (two-tailed)	n	Baseline Source	Baseline (‰)	Error
4	1	H19688	759	SWC	Limon	9.98687	-83.0642	Conus planiliratus	Moin	Empalme	1.9-2.9	2.4	2.5-1.5 Ma	2.5-0.1 Ma	Plio-Pleistocene	30	10	20	0-50	-0.12±0.62	4, 6	-0.770664	0.32112	-0.73	-1.46	0	1.46	2.2316	0.342778	2.23	0.33	0.007	67	Estimated	-0.12	0.62
14	2	EJ11-SCS-A		SWC	Bocas del Toro	9.45384	-82.2992	Conus sp.	Swan Cay	Swan Cay Shallow	1.4	1.4	1.5 to 0.011 Ma	2.5-0.1 Ma	Pleistocene	120	80	100	51-100	0.35±0.31	1, 2, 4	1.16932	0.218269	1.16094	0.69442	1.73158	1.03716	2.38525	0.206948	2.40087	0.118489	0.432873	46	Estimated	0.35	0.32
14	3	EJ11-SCS-B		SWC	Bocas del Toro	9.45384	-82.2992	Conus sp.	Swan Cay	Swan Cay Shallow	1.4	1.4	1.5 to 0.011 Ma	2.5-0.1 Ma	Pleistocene	120	80	100	51-100	0.35±0.31	1, 2, 4	0.126894	0.146206	0.11177	-0.0994653	0.510215	0.60968	1.88247	0.206018	1.89942	0.172425	0.380278	28	Estimated	0.35	0.32
14	4	EJ11-SCS-C		SWC	Bocas del Toro	9.45384	-82.2992	Conus sp.	Swan Cay	Swan Cay Shallow	1.4	1.4	1.5 to 0.011 Ma	2.5-0.1 Ma	Pleistocene	120	80	100	51-100	0.35±0.31	1, 2, 4	0.730985	0.285278	0.768285	-0.013475	1.19159	1.20506	2.50679	0.212655	2.51406	0.343167	0.0738052	28	Estimated	0.35	0.32
16	5	EJ11-CANE-1		SWC	Bocas del Toro	9.35102	-82.1685	Conus sp.	Ground Creek	Wild Cane Key	1.9-2.2	2.05	2.5-1.5 Ma	2.5-0.1 Ma	Pleistocene			30	0-50	-0.17±0.40	2, 3, 4	0.828333	0.211559	0.83	0.327	1.21	0.883	2.26417	0.116334	2.27	-0.164674	0.337183	36	Estimated	-0.17	0.4
16	6	EJ11-CANE-3		SWC	Bocas del Toro	9.35102	-82.1685	Conus sp.	Ground Creek	Wild Cane Key	1.9-2.2	2.05	2.5-1.5 Ma	2.5-0.1 Ma	Pleistocene			30	0-50	-0.17±0.40	2, 3, 4	0.6392	0.273339	0.671	0.217	1.104	0.887	2.5223	0.144865	2.5595	0.251813	0.482779	10	Estimated	-0.17	0.4
16	7	JL06-6-1		SWC	Bocas del Toro	9.35103	-82.1687	Conus sp.	Ground Creek	Wild Cane Key	1.9-2.2	2.05	2.5-1.5 Ma	2.5-0.1 Ma	Pleistocene		<50	30	0-50	-0.17±0.40	2, 3, 4	-0.128539	0.173068	-0.12	-0.528	0.247935	0.775935	1.14745	0.171208	1.13	-0.04	0.792	46	Estimated	-0.17	0.4
33	8	EJ11-NWEV-A		SWC	Bocas del Toro	9.10545	-81.5685	Conus sp.	Escudo de Veraguas	NW Escudo de Veraguas	2	2	2.5-1.5 Ma	2.5-0.1 Ma	Plio-Pleistocene?			125	101-150	0.38±0.17	1	0.627801	0.209699	0.59987	0.225898	1.15393	0.928035	1.59511	0.266754	1.63034	-0.115725	0.37447	61	Estimated	0.38	0.17
33	9	EJ11-NWEV-B		SWC	Bocas del Toro	9.10545	-81.5685	Conus sp.	Escudo de Veraguas	NW Escudo de Veraguas	2	2	2.5-1.5 Ma	2.5-0.1 Ma	Plio-Pleistocene?			125	101-150	0.38±0.17	1	0.105571	0.241371	0.0977547	-0.487899	0.724454	1.21235	1.86556	0.261845	1.90334	0.205666	0.143546	52	Estimated	0.38	0.17
33	10	EJ11-NWEV-C		SWC	Bocas del Toro	9.10545	-81.5685	Conus sp.	Escudo de Veraguas	NW Escudo de Veraguas	2	2	2.5-1.5 Ma	2.5-0.1 Ma	Plio-Pleistocene?			125	101-150	0.38±0.17	1	0.0779562	0.322453	0.00702842	-0.322734	0.747016	1.06975	1.24677	0.204149	1.18048	0.464455	0.176263	10	Estimated	0.38	0.17
1	11	H19682	944	SWC	Limon	9.99195	-83.0367	Conus cf. daucus	Moin	Upper Lomas del Mar	1.5-1.7	1.6	2.5-1.5 Ma	2.5-0.1 Ma	Pleistocene	100	50	75	51-100	0.20±0.33	1, 2, 4	-0.2337	0.120723	-0.2365	-0.524	0.041	0.565	1.6213	0.223579	1.6895	0.0943172	0.473491	60	Estimated	0.2	0.33
1	12	H19683	944	SWC	Limon	9.99195	-83.0367	Conus cf. daucus	Moin	Upper Lomas del Mar	1.5-1.7	1.6	2.5-1.5 Ma	2.5-0.1 Ma	Pleistocene	100	50	75	51-100	0.20±0.33	1, 2, 4	0.0167769	0.155342	0.00406361	-0.31	0.45	0.76	1.74521	0.211764	1.7961	0.191942	0.160355	55	Estimated	0.2	0.33
2	13	JL06-33-1C		SWC	Limon	9.99622	-83.0397	Conus sp.	Moin	Upper Lomas del Mar	1.5-1.7	1.6	2.5-1.5 Ma	2.5-0.1 Ma	Pleistocene	100	50	75	51-100	0.20±0.33	1, 2, 4	0.0278134	0.233977	0.04	-0.442611	0.45189	0.894501	2.08642	0.170295	2.1	0.21	0.184066	40	Calculated	0.2	0.33
2	14	JL06-33-1F		SWC	Limon	9.99622	-83.0397	Conus sp.	Moin	Upper Lomas del Mar	1.5-1.7	1.6	2.5-1.5 Ma	2.5-0.1 Ma	Pleistocene	100	50	75	51-100	0.20±0.33	1, 2, 4	0.040858	0.258828	0.02	-0.5378	0.572688	1.11049	1.68903	0.152938	1.69	0.61	0	33	Calculated	0.2	0.33
3	15	H19684	1988	SWC	Limon	9.99117	-83.0417	C. cf. vacuanus	Moin	Lower Lomas del Mar	1.5-1.9	1.7	2.5-1.5 Ma	2.5-0.1 Ma	Pleistocene	100	50	75	51-100	0.26±0.25	1, 2, 4	0.256333	0.291099	0.15	-0.215	1.001	1.216	1.98933	0.18307	2	0.321306	0.0123065	60	Calculated	0.26	0.25
3	16	H19685	1988	SWC	Limon	9.99117	-83.0417	C. cf. vacuanus	Moin	Lower Lomas del Mar	1.5-1.9	1.7	2.5-1.5 Ma	2.5-0.1 Ma	Pleistocene	100	50	75	51-100	0.26±0.25	1, 2, 4	0.363469	0.140112	0.36	0.052	0.647	0.595	0.634286	0.499667	0.69	0.445913	0.00132213	49	Calculated	0.26	0.25
5	17	H19687	718	SWC	Limon	9.98534	-83.0661	S. cf. pugiloides	Moin	Empalme	1.9-2.9	2.4	2.5-1.5 Ma	2.5-0.1 Ma	Plio-Pleistocene	30	10	20	0-50	-0.12±0.62	4, 6	0.357632	0.241856	0.37	-0.101	0.72	0.821	1.19184	0.384151	1.25	0.83	0	38	Estimated	-0.12	0.62
13	18	H19711	1995	SWC	Bocas del Toro	9.45243	-82.2982	Conus jaspideus?	Swan Cay	Swan Cay	1.2-1.6	1.4	1.5 to 0.011 Ma	2.5-0.1 Ma	Pleistocene	120	80	100	51-100	0.35±0.31	1, 2, 4	0.674722	0.239118	0.671213	0.123859	1.0548	0.930941	2.49727	0.177522	2.56562	0.512261	0.000617307	46	Estimated	0.35	0.31
13	19	H19712	1995	SWC	Bocas del Toro	9.45243	-82.2982	Conus jaspideus?	Swan Cay	Swan Cay	1.2-1.6	1.4	1.5 to 0.011 Ma	2.5-0.1 Ma	Pleistocene	120	80	100	51-100	0.35±0.31	1, 2, 4	0.420894	0.213975	0.49	0.04	0.93	0.89	2.68354	0.19027	2.68	-0.14	0.372	43	Estimated	0.35	0.31
29	20	AT06-22-1A		SWC	Bocas del Toro	9.0653	-81.7817	Conus sp.	Shark Hole Point	Shark Hole Point	5.6-5.7	5.65	4.25+ Ma	4.25+ Ma	Pliocene	200	150	175	151-200	N/A	N/A	0.0818182	0.136438	0.07	-0.215991	0.336084	0.552075	2.06818	0.31872	2.04	0.6	0	44	N/A
7	21	H19679	463	SWC	Limon	9.93952	-83.0772	Conus sp.	Rio Banano	Rio Limoncito	2.4-3.6	3	4.25-2.5 Ma	4.25-2.5 Ma	Plio-Pleistocene	40	20	30	0-50	-0.63±0.20	2, 3, 4	-0.849727	0.151323	-0.8325	-1.166	-0.639	0.527	1.76473	0.230505	1.7885	0.0396174	0.861045	22	Estimated	-0.63	0.2
7	22	H19680	463	SWC	Limon	9.93952	-83.0772	Strombus sp.	Rio Banano	Rio Limoncito	2.4-3.6	3	4.25-2.5 Ma	4.25-2.5 Ma	Plio-Pleistocene	40	20	30	0-50	-0.63±0.20	2, 3, 4	-0.500625	0.528049	-0.685	-1.152	0.41	1.562	-0.8225	0.209716	-0.855	-0.17468	0.23504	48	Calculated	-0.63	0.2
11	23	H19674	1727	SWC	Limon	9.91427	-83.0695	C. costaricensis	Rio Banano	La Bomba	2.9-3.2	3.05	4.25-2.5 Ma	4.25-2.5 Ma	Pliocene	40	20	30	0-50	-0.39±0.19	2, 3, 4	-1.24083	0.249475	-1.24	-1.7	-0.68	1.02	1.57708	0.252089	1.57	-0.566211	2.73344e-05	48	Calculated	-0.39	0.19
11	24	H19675	1727	SWC	Limon	9.91427	-83.0695	C. costaricensis	Rio Banano	La Bomba	2.9-3.2	3.05	4.25-2.5 Ma	4.25-2.5 Ma	Pliocene	40	20	30	0-50	-0.39±0.19	2, 3, 4	-1.12176	0.200143	-1.055	-1.518	-0.735	0.783	1.89794	0.212372	1.88	-0.463708	0.00574162	34	Calculated	-0.39	0.19
12	25	JL06-29-1A		SWC	Limon	9.91269	-83.0675	Conus sp.	Rio Banano	La Bomba	2.9-3.2	3.05	4.25-2.5 Ma	4.25-2.5 Ma	Pliocene	40	20	30	0-50	-0.39±0.19	2, 3, 4	-0.873953	0.23508	-0.9	-1.37898	-0.281352	1.09763	1.53419	0.457562	1.63	-0.00778905	0.960464	43	Calculated	-0.39	0.19
12	26	JL06-29-1B		SWC	Limon	9.91269	-83.0675	Conus sp.	Rio Banano	La Bomba	2.9-3.2	3.05	4.25-2.5 Ma	4.25-2.5 Ma	Pliocene	40	20	30	0-50	-0.39±0.19	2, 3, 4	-0.84971	0.212863	-0.83	-1.19455	-0.398157	0.796397	1.30073	0.38635	1.28	0.16	0.369081	35	Calculated	-0.39	0.19
8	27	H19672	696	SWC	Limon	9.918	-83.0755	Conus cf. recognitus	Rio Banano	La Bomba	2.9-3.6	3.25	4.25-2.5 Ma	4.25-2.5 Ma	Pliocene	40	20	30	0-50	-0.39±0.19	2, 3, 4	-1.09307	0.259289	-1.11	-1.67	-0.55	1.12	0.12962	0.899844	0.15	0.46	0.004	36	Estimated	-0.39	0.19
8	28	H19673	696	SWC	Limon	9.918	-83.0755	Conus cf. recognitus	Rio Banano	La Bomba	2.9-3.6	3.25	4.25-2.5 Ma	4.25-2.5 Ma	Pliocene	40	20	30	0-50	-0.39±0.19	2, 3, 4	-1.18253	0.265954	-1.13	-1.632	-0.64	0.992	-0.148731	1.37927	-1.41	0	0.999	27	Estimated	-0.39	0.19
8	29	EJ12-AGU1		SWC	Limon	9.92	-83.08	Conus cf. recognitus	Rio Banano	Agua	3.35	3.35	4.25-2.5 Ma	4.25-2.5 Ma	Pliocene			30	0-50	-0.46±0.22	2, 3, 4	-1.07028	0.139373	-1.03752	-1.3	-0.73	0.57	1.55877	0.308202	1.6124	0.524648	0.00102029	36	Estimated	-0.46	0.22
8	30	EJ12-AGU2-A		SWC	Limon	9.92	-83.08	Conus cf. recognitus	Rio Banano	Agua	3.35	3.35	4.25-2.5 Ma	4.25-2.5 Ma	Pliocene			30	0-50	-0.46±0.22	2, 3, 4	-1.24722	0.272907	-1.20666	-1.76449	-0.724352	1.04014	1.35851	0.301784	1.33198	0.254534	0.2195	25	Estimated	-0.46	0.22
9	31	H19676	1734	SWC	Limon	9.91176	-83.0868	Conus imitator	Rio Banano	Quitaria	3.4-3.6	3.5	4.25-2.5 Ma	4.25-2.5 Ma	Pliocene	40	20	30	0-50	-0.63±0.20	2, 3, 4	-1.27825	0.220523	-1.3	-1.79	-0.81	0.98	2.01285	0.318067	1.86	0.16	0.001	68	Estimated	-0.63	0.2
9	32	H19677	1734	SWC	Limon	9.91176	-83.0868	Conus imitator	Rio Banano	Quitaria	3.4-3.6	3.5	4.25-2.5 Ma	4.25-2.5 Ma	Pliocene	40	20	30	0-50	-0.63±0.20	2, 3, 4	-1.21302	0.181057	-1.205	-1.579	-0.759	0.82	1.55958	0.226055	1.56351	0.652938	6.84708e-05	31	Estimated	-0.63	0.2
6	33	H19678	723	SWC	Limon	9.96953	-83.1303	Conus aff. imitator	Rio Banano	Santa Rita	3.5-3.6	3.55	4.25-2.5 Ma	4.25-2.5 Ma	Pliocene	40	20	30	0-50	-0.68±0.20	2, 3, 4	-0.613179	0.217856	-0.623228	-1.14562	-0.1	1.04562	1.22515	0.336565	1.06	0.53	0.000204381	53	Estimated	-0.68	0.2
15	34	H19709	1286	SWC	Bocas del Toro	9.4058	-82.3097	Conus sp.	Ground Creek	Ground Creek	1.6-3.5	2.55	4.25-2.5 Ma	4.25-2.5 Ma	Plio-Pleistocene	50	0	25	0-50	-0.17±0.27	1, 2	-0.928632	0.231221	-0.9065	-1.6	-0.559	1.041	2.04329	0.341864	2.107	0.506791	0.00116657	38	Calculated	-0.17	0.27
15	35	H19710	1286	SWC	Bocas del Toro	9.4058	-82.3097	Conus sp.	Ground Creek	Ground Creek	1.6-3.5	2.55	4.25-2.5 Ma	4.25-2.5 Ma	Plio-Pleistocene	50	0	25	0-50	-0.17±0.27	1, 2	-0.665261	0.243469	-0.682	-1.184	-0.141	1.043	2.19778	0.22808	2.223	0.589871	0.00305118	23	Calculated	-0.17	0.27
15	36	H19716	1286	SWC	Bocas del Toro	9.4058	-82.3097	Strombus gatunensis	No section	Isla Colon, Ground Creek?	1.6-3.5	2.55	4.25-2.5 Ma	4.25-2.5 Ma	Plio-Pleistocene	50	0	25	0-50	'-0.17±0.27	2	-0.853723	0.178186	-0.95	-1.34	-0.557566	0.782434	-0.00549676	0.363987	0.07	-0.78	3.7354e-10	61	Estimated	-0.17	0.27
19	37	H19691	1276	SWC	Bocas del Toro	9.17687	-82.0743	Conus sp.	Cayo Agua	Isla Popa	3.5-5.0	4.25	4.25-2.5 Ma	4.25-2.5 Ma	Pliocene	50	0	25	0-50	-0.49±0.20	2	-0.847679	0.493824	-0.745	-2.36	-0.03	2.33	1.87946	0.21282	1.865	0.18317	0.17661	56	G. sacculifer	-0.49	0.2
19	38	H19692	1276	SWC	Bocas del Toro	9.17687	-82.0743	Conus sp.	Cayo Agua	Isla Popa	3.5-5.0	4.25	4.25-2.5 Ma	4.25-2.5 Ma	Pliocene	50	0	25	0-50	-0.49±0.20	2	-0.852979	0.198822	-0.8	-1.6	-0.58	1.02	1.71723	0.217593	1.71	0.0985965	0.50967	47	G. sacculifer	-0.49	0.2
24	39	H19697	350	SWC	Bocas del Toro	9.14743	-82.0149	Conus cf. consobrinus	Cayo Agua	Pt Piedra Roja W?	3.5-5.0	4.25	4.25-2.5 Ma	4.25-2.5 Ma	Pliocene	75	10	42.5	0-50	-0.61±0.23	2	-0.803652	0.25763	-0.810055	-1.42735	-0.259682	1.16767	1.76542	0.213554	1.83572	0.276255	0.283122	17	Estimated	-0.61	0.23
25	40	H19705	2236	SWC	Bocas del Toro	9.14629	-82.0175	Strombus sp.	Cayo Agua	Pt Piedra Roja W?	3.5-5.0	4.25	4.25-2.5 Ma	4.25-2.5 Ma	Pliocene	75	10	42.5	0-50	-0.61±0.23	2	-0.923354	0.12776	-0.913415	-1.21657	-0.652212	0.564358	-0.907555	0.114927	-0.897212	0.528205	0.000459707	40	Estimated	-0.61	0.23
25	41	H19706	2236	SWC	Bocas del Toro	9.14629	-82.0175	Strombus sp.	Cayo Agua	Pt Piedra Roja W?	3.5-5.0	4.25	4.25-2.5 Ma	4.25-2.5 Ma	Pliocene	75	10	42.5	0-50	-0.61±0.23	2	-1.28924	0.179969	-1.234	-1.724	-1.062	0.662	-1.03805	0.689886	-0.789	0.835566	2.42125e-06	21	Estimated	-0.61	0.23
24	42	H19698	350	SWC	Bocas del Toro	9.14743	-82.0149	Strombus gatunensis	Cayo Agua	Pt Piedra Roja W?	3.5-5.0	4.25	4.25-2.5 Ma	4.25-2.5 Ma	Pliocene	75	10	42.5	0-50	-0.61±0.23	2	-0.551014	0.151494	-0.54	-0.86	-0.24	0.62	-0.553478	0.354263	-0.45	0.581853	1.57585e-07	69	Calculated	-0.61	0.23
26	43	EJ11-WPN-A		SWC	Bocas del Toro	9.17923	-82.0538	Conus sp.	Cayo Agua	West side Punta Norte	3.55	3.55	4.25-2.5 Ma	4.25-2.5 Ma	Pliocene	40	20	30	0-50	-0.33±0.20	1, 3, 4	-1.06332	0.262063	-1.03615	-2.20819	-0.532101	1.67609	0.811337	0.612662	0.849945	0.417517	1.39987e-05	100	Estimated	-0.33	0.2
26	44	EJ11-WPN-B		SWC	Bocas del Toro	9.17923	-82.0538	Conus sp.	Cayo Agua	West side Punta Norte	3.55	3.55	4.25-2.5 Ma	4.25-2.5 Ma	Pliocene	40	20	30	0-50	-0.33±0.20	1, 3, 4	-0.391376	0.296367	-0.380976	-1.14277	0.195409	1.33818	-2.55312	3.76115	-0.976088	0.0571088	0.624126	76	Estimated	-0.33	0.2
26	45	EJ11-WPN-C		SWC	Bocas del Toro	9.17923	-82.0538	Conus sp.	Cayo Agua	West side Punta Norte	3.55	3.55	4.25-2.5 Ma	4.25-2.5 Ma	Pliocene	40	20	30	0-50	-0.33±0.20	1, 3, 4	-0.766997	0.401769	-0.760739	-1.74671	0.225824	1.97253	-0.278052	0.544961	-0.193453	-0.0648227	0.738321	29	Estimated	-0.33	0.2
31	46	H19699	362	SWC	Bocas del Toro	9.10185	-81.5617	Conus sp.	Escudo de Veraguas	NC Escudo de Veraguas	1.9-3.6	2.75	4.25-2.5 Ma	4.25-2.5 Ma	Plio-Pleistocene	150	100	125	101-150	0.38±0.17	1	0.441563	0.17795	0.4535	0.008	0.815	0.807	2.00231	0.34561	2.074	-0.144462	0.430205	32	G. dutertrei	0.38	0.17
30	47	H19703	2170	SWC	Bocas del Toro	9.10436	-81.5665	Conus sp.	Escudo de Veraguas	NC Escudo de Veraguas	1.9-3.6	2.75	4.25-2.5 Ma	4.25-2.5 Ma	Plio-Pleistocene	150	100	125	101-150	0.38±0.17	1	0.230511	0.198743	0.242	-0.196	0.603	0.799	1.55204	0.168055	1.52	0.383978	0.00921467	45	G. dutertrei	0.38	0.17
30	48	H19704	2170	SWC	Bocas del Toro	9.10436	-81.5665	Conus jaspideus?	Escudo de Veraguas	NC Escudo de Veraguas	1.9-3.6	2.75	4.25-2.5 Ma	4.25-2.5 Ma	Plio-Pleistocene	150	100	125	101-150	0.38±0.17	1	0.692766	0.271471	0.73	-0.104	1.139	1.243	2.13868	0.270504	2.2755	0.320445	0.0646496	34	G. dutertrei	0.38	0.17
32	49	H19700	368	SWC	Bocas del Toro	9.10408	-81.5568	Conus sp.	Escudo de Veraguas	NE Escudo de Veraguas	3.5-3.6	3.55	4.25-2.5 Ma	4.25-2.5 Ma	Pliocene	150	100	125	101-150	0.38±0.17	1	-0.0739322	0.209649	-0.063	-0.856	0.286	1.142	1.96698	0.164608	2.002	-0.0299823	0.821651	59	G. dutertrei	0.38	0.17
32	50	H19701	368	SWC	Bocas del Toro	9.10408	-81.5568	Strombus sp.	Escudo de Veraguas	NE Escudo de Veraguas	3.5-3.6	3.55	4.25-2.5 Ma	4.25-2.5 Ma	Pliocene	150	100	125	101-150	0.38±0.17	1	0.443548	0.186522	0.48	0.14	0.82	0.68	-0.473871	0.263738	-0.38	-0.41549	0.0200995	31	G. dutertrei	0.38	0.17
32	51	H19713	2169	SWC	Bocas del Toro	9.10409	-81.5568	Conus sp.	Escudo de Veraguas	NE Escudo de Veraguas	3.5-3.6	3.55	4.25-2.5 Ma	4.25-2.5 Ma	Pliocene	150	100	125	101-150	0.38±0.17	1	-0.00221046	0.213115	-0.0014301	-0.518342	0.49051	1.00885	1.75298	0.206058	1.77438	0.102548	0.576506	32	G. dutertrei	0.38	0.17
32	52	H19714	2169	SWC	Bocas del Toro	9.10409	-81.5568	Conus sp.	Escudo de Veraguas	NE Escudo de Veraguas	3.5-3.6	3.55	4.25-2.5 Ma	4.25-2.5 Ma	Pliocene	150	100	125	101-150	0.38±0.17	1	0.112592	0.23314	0.120851	-0.471475	0.583382	1.05486	1.91757	0.127826	1.90953	0.293878	0.102561	32	G. dutertrei	0.38	0.17
34	53	AT06-19-1		SWC	Bocas del Toro	9.09038	-81.5405	Conus sp.	Escudo de Veraguas	SE Escudo de Veraguas	3.5-3.6	3.55	4.25-2.5 Ma	4.25-2.5 Ma	Pliocene	150	100	125	101-150	0.38±0.17	1	0.702778	0.321511	0.72	0.0422697	1.38005	1.33779	2.19889	0.167806	2.21	0.32	0.0587359	36	G. dutertrei	0.38	0.17
28	54	H19702	400	SWC	Bocas del Toro	9.07701	-81.827	Conus sp.	Shark Hole Point	Bruno Bluff	3.3-3.6	3.45	4.25-2.5 Ma	4.25-2.5 Ma	Pliocene	200	150	175	151-200	N/A	N/A	1.82225	0.11767	1.82337	1.60512	2.08081	0.475698	1.40465	0.151765	1.35469	0.602459	9.42428e-06	45	N/A
27	55	EJ11-BBL-A		SWC	Bocas del Toro	9.04387	-81.7399	Conus sp.	Shark Hole Point	Bruno Bluff	3.3-3.6	3.45	4.25-2.5 Ma	4.25-2.5 Ma	Pliocene	200	150	175	151-200	N/A	N/A	0.910827	0.267506	0.992464	0.135907	1.15272	1.01682	1.77754	0.100567	1.76712	-0.127107	0.639002	16	Estimated
27	56	EJ11-BBL-B		SWC	Bocas del Toro	9.04387	-81.7399	Conus sp.	Shark Hole Point	Bruno Bluff	3.3-3.6	3.45	4.25-2.5 Ma	4.25-2.5 Ma	Pliocene	200	150	175	151-200	N/A	N/A	0.91346	0.13685	0.910728	0.663167	1.16245	0.499288	1.62837	0.236211	1.69982	0.419928	0.032698	26	Estimated
18	57	H19690	1256	SWC	Bocas del Toro	9.31809	-82.1116	Conus sp.	Ground Creek	Fish Hole	2.2-3.0	2.6	4.25-2.5 Ma	4.25-2.5 Ma	Plio-Pleistocene	100	75	87.5	51-100	0.16±0.32	1, 2	-0.17241	0.186721	-0.17	-0.57	0.41	0.98	2.4012	0.249098	2.39	0.328933	0.00239548	83	Calculated	0.16	0.32
18	58	H19708	3203	SWC	Bocas del Toro	9.31815	-82.1097	Conus sp.	Ground Creek	Fish Hole	2.2-3.0	2.6	4.25-2.5 Ma	4.25-2.5 Ma	Plio-Pleistocene	100	75	87.5	51-100	0.16±0.32	1, 2	0.936104	0.176507	0.88	0.48	1.27659	0.796593	1.41535	0.521753	1.52042	0.25	0.076	53	Estimated	0.16	0.32
17	59	EJ11-SOL-1		SWC	Bocas del Toro	9.33315	-82.2182	Conus sp.	Old Bank	Isla Solarte	3.5-3.6	3.55	4.25-2.5 Ma	4.25-2.5 Ma	Pliocene	100	50	75	51-100	-0.06±0.24	1, 2	-0.360556	0.207212	-0.385	-0.73	-0.014	0.716	1.62972	0.146745	1.65	0.275304	0.10414	36	Calculated	-0.06	0.24
17	60	EJ11-SOL-2		SWC	Bocas del Toro	9.33315	-82.2182	Conus sp.	Old Bank	Isla Solarte	3.5-3.6	3.55	4.25-2.5 Ma	4.25-2.5 Ma	Pliocene	100	50	75	51-100	-0.06±0.24	1, 2	0.0115	0.23834	0.01	-0.6	0.55	1.15	1.78733	0.335831	1.83	0.709126	2.28361e-10	60	Calculated	-0.06	0.24
25	61	H19693	294	SWC	Bocas del Toro	9.15489	-82.0265	Strombus sp.	Cayo Agua	Punta Tiburon	3.5-3.6	3.55	4.25-2.5 Ma	4.25-2.5 Ma	Pliocene	80	40	60	51-100	-0.11±0.58	2	-0.998143	0.333437	-0.93	-1.64	-0.23	1.41	-0.338686	0.257341	-0.93	0.19	0.27	81	Estimated	-0.11	0.58
25	62	EJ11-PTI-A		SWC	Bocas del Toro	9.15653	-82.0261	Conus sp.	Cayo Agua	Punta Tiburon	3.5-3.6	3.55	4.25-2.5 Ma	4.25-2.5 Ma	Pliocene	80	40	60	51-100	-0.11±0.58	2	-0.667443	0.235029	-0.646524	-1.16812	-0.209022	0.959099	1.60616	0.400434	1.78974	-0.000732834	0.994721	84	Estimated	-0.11	0.58
24	63	H19694	310	SWC	Bocas del Toro	9.16698	-82.0306	Conus sp.	Cayo Agua	Punta Nispero	3.5-3.6	3.55	4.25-2.5 Ma	4.25-2.5 Ma	Pliocene	80	40	60	51-100	-0.11±0.58	2	-2.2119	0.640936	-1.85	-3.49	-0.21	3.28	-5.60408	2.05413	-5	0.943821	1.32015e-28	68	Estimated	-0.11	0.58
21	64	H19695	326	SWC	Bocas del Toro	9.16832	-82.0346	Strombus gatunensis	Cayo Agua	Punta Nispero	3.5-3.6	3.55	4.25-2.5 Ma	4.25-2.5 Ma	Pliocene	80	40	60	51-100	-0.11±0.58	2	-1.10232	0.178352	-1.11723	-1.45935	-0.630294	0.829057	-1.25038	0.367823	-1.24603	0.148979	0.372026	38	Estimated	-0.11	0.58
21	65	H19696	326	SWC	Bocas del Toro	9.16832	-82.0346	Strombus gatunensis	Cayo Agua	Punta Nispero	3.5-3.6	3.55	4.25-2.5 Ma	4.25-2.5 Ma	Pliocene	80	40	60	51-100	-0.11±0.58	2	-1.09086	0.127235	-1.075	-1.517	-0.91	0.607	-1.25983	0.354311	-1.192	0.324224	0.0861801	29	Estimated	-0.11	0.58
22	66	H19707	2239	SWC	Bocas del Toro	9.16855	-82.0319	Conus sp.	Cayo Agua	Punta Nispero	3.5-3.6	3.55	4.25-2.5 Ma	4.25-2.5 Ma	Pliocene	80	40	60	51-100	-0.11±0.58	2	-0.609079	0.0796752	-0.617275	-0.825038	-0.420442	0.404596	-15.802	2.23989	-16.0242	-0.3775	0.0115303	44	Estimated	-0.11	0.58
22	67	H19715	2239	SWC	Bocas del Toro	9.16855	-82.0319	Conus sp.	Cayo Agua	Punta Nispero	3.5-3.6	3.55	4.25-2.5 Ma	4.25-2.5 Ma	Pliocene	80	40	60	51-100	-0.11±0.58	2	-1.01551	0.327831	-0.98	-1.69	-0.55	1.14	-3.63038	2.64996	-3.42	-0.58	9e-05	40	Estimated	-0.11	0.58
23	68	EJ11-NIS2-A		SWC	Bocas del Toro	9.169	-82.032	Conus sp.	Cayo Agua	Punta Nispero	3.5-3.6	3.55	4.25-2.5 Ma	4.25-2.5 Ma	Pliocene	80	40	60	51-100	-0.11±0.58	2	-0.15528	0.320389	-0.150191	-0.825894	0.589002	1.4149	1.6013	0.361224	1.72683	-0.0377288	0.817211	40	Estimated	-0.11	0.58
23	69	EJ11-NIS2-B		SWC	Bocas del Toro	9.169	-82.032	Conus sp.	Cayo Agua	Punta Nispero	3.5-3.6	3.55	4.25-2.5 Ma	4.25-2.5 Ma	Pliocene	80	40	60	51-100	-0.11±0.58	2	-0.763532	0.258705	-0.786592	-1.46784	-0.232323	1.23551	1.52104	0.354891	1.60537	-0.264336	0.0635949	50	Estimated	-0.11	0.58
20	70	JL06-15-1		SWC	Bocas del Toro	9.17488	-82.0424	Conus sp.	Cayo Agua	Punta Norte East	3.5-5.0	4.25	4.25-2.5 Ma	4.25-2.5 Ma	Pliocene	80	40	60	51-100	-0.11±0.58	2	-0.666446	0.215614	-0.65	-1.32202	-0.221923	1.1001	0.242566	0.725753	0.35	0.25	0.0261121	80	Calculated	-0.11	0.58
35	71	AT11-01-2A3		TEP	Burica	8.2794	-82.8667	Conus sp.	Armuelles	Rabo de Puerco, Waypoint 2	0.36	0.36		2.5-0.1 Ma	Pleistocene	80	1	40.5	0-50	-0.29±0.63	6,7,8	-0.662636	0.469418	-0.706	-1.625	0.515	2.14	-0.901964	0.66048	-0.771	0.50448	8.59097e-05	55	Estimated	-0.29	0.63
37	72	AT11-07-SH6		TEP	Burica	8.13052	-82.8716	Conus sp.	Upper Burica	Quebrada calabazo	1	1		2.5-0.1 Ma	Pleistocene				0-50	-0.08±0.38	7,8	1.14857	0.369335	1.185	0.261	1.896	1.635	1.04477	0.450667	0.946	-0.239308	0.0843802	53	Estimated	-0.08	0.38
36	73	AT06-5-1A		TEP	Burica	8.21437	-82.9472	Conus sp.	La Peña	Punta la Peñita	~3.5	3.5		4.25-2.5 Ma	Pliocene		<50		0-50	-0.90±0.25	5	-0.817753	0.422236	-0.76	-1.89827	0.105	2.00327	2.31742	0.409438	2.45	-0.26	0.015	89	G. sacculifer	-0.9	0.25
36	74	AT06-5-1B		TEP	Burica	8.21437	-82.9472	Conus sp.	La Peña	Punta la Peñita	~3.55	3.5		4.25-2.5 Ma	Pliocene		<50		0-50	-0.90±0.25	5	-0.4205	0.390443	-0.3	-1.30033	0.187148	1.48747	2.70175	0.207758	2.71	0.32	0.042	40	G. sacculifer	-0.9	0.25
			Estimated means either interpolated or extrapolated due to age or depth
			N/A means we don't have anything to use for a baseline
Core		Refs:								Refs:
OPD 999A		1: Steph et al., 2010, Paleoceanography, 25, PA2202								O'Dea, A., et al. (2007). "Environmental change preceded Caribbean extinction by 2 million years." Proceedings of the National Academy of Sciences 104(13): 5501-5506.
OPD 999A		2: Haug et al., 2001, Geology, 29, 207-210								O'Dea, A., et al. (2012). "History of upwelling in the Tropical Eastern Pacific and the paleogeography of the Isthmus of Panama." Palaeogeography, Palaeoclimatology, Palaeoecology 348–349: 59-66.
MD03-2628		3: Sepulcre et al., 2011, Climate of the Past, 7, 75-90								Johnson, K. G., et al. (2008). "Caribbean Reef Development Was Independent of Coral Diversity over 28 Million Years." Science 319(5869): 1521-1523.
DSDP 502B		4: Prell et al., 1982, Initial Reports of the DSDP, 68
ODP 1241		5: Steph et al., 2006, Proceedings of the ODP, Scientific Results, 202, 1-51
111-677A and B		6: Shackleton and Hall. 1989, Proceedings of the ODP, Scientific Results, 111, 295-316
ODP leg 138 Core 851		7: Cannariato and Ravelo, 1997, Paleoceanography 12(6): 805-820
ODP leg 138 Core 851		8: Ravelo, AC; Shackleton, NJ (1995): (Table 1) Stable carbon and oxygen isotope ratios of planktonic foraminifera from ODP Site 138-851. doi:10.1594/PANGAEA.807744, in Supplement to: Ravelo, Ana Christina; Shackleton, Nicholas J (1995): Evidence for surface-water circulation changes at Site 851 in the eastern Tropical Pacific Ocean. In: Pisias, NG; Mayer, LA; Janecek, TR; Palmer-Julson, A; van A…
		* List the pubs this is based on
